# Supplementary material
Source: Research Square preprint supplement (doi:10.21203/rs.3.rs-9589496/v1)
Supplement: Supplementary file 1 [file 3a429e6241e3147f2f5b0444.docx]

## **APPENDIX IV**

### **PROSTATE GLAND DATA WORKSHEET**

**SECTION ONE (SOCIO-DEMOGRAPHICS)**

Name (initials)

Age (years)-------------------

Ethnicity/Tribe

Marital Status: Married □, Co-habiting □, Widowed □

Educational status: Primary □, Secondary □, Tertiary □, None □

Religion: Christianity □, Islam □, Other Specify □

Occupation: Farmers □, Civil Servant □, Retired civil servant □, Clergy men□, Business men, Others, Specify------------------------------

**MEDICAL HISTORY**

Family History of Prostate Gland Disease--------------------------------------------------------------------If On Any Related Medications Yes □ No □

History of Diabetes Yes □ No □

History of Hypertension/Cardiovascular Disease Yes □ No □

**ANTHROPOMETRIC PARAMETERS**

Weight: ------------------------------------

Height: ------------------------------------

Body mass index: ------------------------

**SECTION TWO (SYMPTOMS, SONOGRAPHIC FINDINGS AND LABORATORY RESULT)**

Irritative symptoms/ type-----------------------------------------------------------

Obstructive symptoms/type--------------------------------------------------------

Haematuria ------- (yes) ---- - (no)

Other associated symptoms

**Ultrasound Findings**

| **Length (l) (cm)** | **Width(h) (cm)** | **Depth (h) (cm)** | **Volume (ml3)** | **Prostate characteristic patterns (isoechoic, hyperechoic and hypoechoic, nodularity, calcifications)** |
| --- | --- | --- | --- | --- |
|  |  |  |  |  |
|  |  |  |  |  |

Serum (PSA) Level---------------------

**INTERNATIONAL PROSTATE SYMPTOMS SCORE (IPSS)**

|  | | **None at all** | **Less than 1 time in 5** | | **Less than half the time** | **About half the time** | **More than half the time** | **Almost always** | **Patient score** |
| --- | --- | --- | --- | --- | --- | --- | --- | --- | --- |
| Over the past month, how often have you had a sensation of not emptying your bladder completely after you have finished urinating? | | 0 | 1 | | 2 | 3 | 4 | 5 |  |
| Over the past month, how often have you had to urinate again less than two hours after you have finished urinating? | | 0 | 1 | | 2 | 3 | 4 | 5 |  |
| Over the past month, how often have you found you stopped and started again several times when you urinated? | | 0 | 1 | | 2 | 3 | 4 | 5 |  |
| Over the past month, how often have you found it difficult to postpone urination? | | 0 | 1 | | 2 | 3 | 4 | 5 |  |
| Over the past month, how often have you had a weak urinary stream? | | 0 | 1 | | 2 | 3 | 4 | 5 |  |
| Over the past month, how often have you had to push or strain to begin urination? | | 0 | 1 | | 2 | 3 | 4 | 5 |  |
| Over the past month, how many times did you most typically get up to urinate from the time you went to bed at night until the time you got up in the morning | | None | 1 time | | 2 time | 3 time | 4 time | 5 or more times |  |
| Total IPS score | | | | | | | | |  |
|  | | | | | | | | |  |
| IPS score |  | | |  | | | | | |
| Mild | Moderate | | | Severe | | | | | |
| 0 – 7 | 8 – 19 | | | 20 – 35 | | | | | |

Patients score Mild □ Moderate □ Severe □
